# Supplementary material
Source: MDPI journal article supplement (https://www.mdpi.com/2227-9717/10/1/151)
Supplement: s1 [file s1]

Supplementary information on analysed results:

**Table S1.** Concentrating of TP, ortho-P, metal ions, and COD in the leachate after solid-liquid separation (three different trials).

|            | Sample id | COD g/l |         | ortho-P (mg/l) |         | TP (mg/l) |         | Fe3+ (mg/l) |         | Ca2+ (mg/l) |         | Al3+ (mg/l) |         |
|------------|-----------|---------|---------|----------------|---------|-----------|---------|-------------|---------|-------------|---------|-------------|---------|
|            |           | Trial   | Average | Trial          | Average | Trial     | Average | Trial       | Average | Trial       | Average | Trial       | Average |
| Scenerio 1 | L1.1      | 41.2    | 42.4    | 159            | 153     | 173       | 180     | 78.34       | 80.98   | 279         | 276     | 0.73        | 0.96    |
|            |           | 42.1    |         | 148            |         | 183       |         | 84.78       |         | 276         |         | 0.97        |         |
|            |           | 43.9    |         | 152            |         | 184       |         | 79.82       |         | 273         |         | 1.18        |         |
|            | L1.2      | 39.4    | 39.1    | 260            | 268     | 309       | 306     | 655         | 652     | 486         | 482     | 1.26        | 1.59    |
|            |           | 40.8    |         | 273            |         | 301       |         | 655         |         | 481         |         | 1.39        |         |
|            |           | 37.1    |         | 271            |         | 308       |         | 646         |         | 479         |         | 2.12        |         |
| Scenerio 2 | L2.1      | 47.4    | 47.3    | 673            | 668     | 689       | 689     | 731         | 728     | 506         | 512     | 119.3       | 116.2   |
|            |           | 45.8    |         | 669            |         | 683       |         | 724         |         | 518         |         | 108.3       |         |
|            |           | 48.7    |         | 662            |         | 695       |         | 729         |         | 490         |         | 121         |         |
|            | L2.2      | 44.2    | 45.6    | 697            | 703     | 734       | 738     | 622         | 622     | 528         | 521     | 94.3        | 87.5    |
|            |           | 43.9    |         | 704            |         | 741       |         | 625         |         | 518         |         | 82.4        |         |
|            |           | 48.7    |         | 708            |         | 739       |         | 619         |         | 517         |         | 85.8        |         |
|            | L2.3      | 38.3    | 40.7    | 929            | 934     | 963       | 957     | 836         | 837     | 356         | 360     | 128         | 134     |
|            |           | 41.4    |         | 933            |         | 955       |         | 833         |         | 364         |         | 129         |         |
|            |           | 42.4    |         | 940            |         | 953       |         | 842         |         | 360         |         | 145         |         |
|            | L2.4      | 39.2    | 39.1    | 1083           | 1090    | 1099      | 1097    | 831         | 837     | 289         | 286     | 126         | 129     |
|            |           | 37.9    |         | 1096           |         | 1100      |         | 840         |         | 281         |         | 119         |         |
|            |           | 40.2    |         | 1091           |         | 1092      |         | 840         |         | 288         |         | 142         |         |
| Scenerio 3 | L3.1      | 38.5    | 39.1    | 166            | 163     | 171       | 171     | 98.34       | 95.4    | 553         | 558     | 1.89        | 1.79    |
|            |           | 37.6    |         | 164            |         | 165       |         | 95.9        |         | 569         |         | 2.34        |         |
|            |           | 41.2    |         | 159            |         | 177       |         | 91.96       |         | 552         |         | 1.14        |         |
|            | L3.2      | 42.6    | 44      | 280            | 288     | 312       | 310     | 521         | 519     | 490         | 497     | 9.34        | 9.53    |
|            |           | 45.2    |         | 290            |         | 306       |         | 515         |         | 509         |         | 7.89        |         |
|            |           | 44.2    |         | 294            |         | 312       |         | 521         |         | 492         |         | 11.36       |         |
